# Supplementary material
Source: PubMed Central journal article supplement (PMC4836883)
Supplement: supp_WNL.0000000000002592_Tables_e-1-2.pdf [file supp_WNL.0000000000002592_Tables_e-1-2.pdf]

Table e-1. IEDs by type of discharge

|                                | All                      | Children                 | Adults                   |
|--------------------------------|--------------------------|--------------------------|--------------------------|
| Total IEDs, n (%)              | 426 (23.6)               | 216 (41.8)               | 210 (15.2)               |
| <b>Generalized</b>             |                          |                          |                          |
| Early IEDs, n (%), 95% CI      | 114 (26.8, 22.8-31.2)    | 63 (29.2, 23.5-35.6)     | 51 (24.3, 19-30.5)       |
| Late IEDs, n (%), 95% CI       | 28 (6.6, 4.6-9.4)        | 11 (5.1, 2.8-9)          | 17 (8.1, 5-12.7)         |
| Late/Total IEDs, n (%), 95% CI | 28/142 (19.7, 14-27.1)   | 11/74 (14.9, 8.3-24.9)   | 17/68 (25, 16.2-36.5)    |
| <b>Focal or multifocal</b>     |                          |                          |                          |
| Early IEDs, n (%), 95% CI      | 202 (47.4, 42.7-52.2)    | 92 (42.6, 36.2-49.3)     | 110 (52.4, 45.6-59)      |
| Late IEDs, n (%), 95% CI       | 45 (10.6, 8-13.9)        | 21 (9.7, 6.4-14.5)       | 24 (11.4, 7.8-16.5)      |
| Late/Total IEDs, n (%), 95% CI | 45/247 (18.2, 13.9-23.5) | 21/113 (18.6, 12.4-26.8) | 24/134 (17.9, 12.3-25.3) |
| <b>Both</b>                    |                          |                          |                          |
| Early IEDs, n (%), 95% CI      | 29 (6.8, 4.8-9.6)        | 22 (10.2, 6.8-15)        | 7 (3.3, 1.5-6.9)         |
| Late IEDs, n (%), 95% CI       | 8 (1.9, 0.9-3.7)         | 7 (3.2, 1.5-6.7)         | 1 (0.5, 0.01-2.9)        |
| Late/Total IEDs, n (%), 95% CI | 8/37 (21.6, 11.1-37.4)   | 7/29 (24.1, 12-42.4)     | 1/8 (12.5, 0.1-49.2)     |
|                                | <i>p</i> = 0.84          | <i>p</i> = 0.62          | <i>p</i> = 0.43          |

Abbreviations: IEDs = interictal epileptiform discharges

Table e-2. Events by EEG indication

|                                  | All (n = 200)        | Children (n = 59)  | Adults (n = 131)      |
|----------------------------------|----------------------|--------------------|-----------------------|
| Seizure-specific, n (% , 95% CI) |                      |                    |                       |
| Seizure                          | 44 (68.8, 56.6-78.8) | 32 (80, 65-89.8)   | 12 (52.2, 33-70.1)    |
| Non-seizure                      | 19 (29.7, 19.9-41.8) | 8 (20, 10.2-35)    | 11 (47.8, 29.2-67)    |
| Non-specific, n (% , 95% CI)     |                      |                    |                       |
| Seizure                          | 10 (7, 3.7-12.6)     | 5 (16.7, 6.9-34)   | 5 (4.5, 1.7-10.3)     |
| Non-seizure                      | 132 (93, 87.4-96.3)  | 25 (83.3, 66-93.1) | 107 (95.5, 89.7-98.3) |
|                                  | p <0.0001            | p <0.0001          | p <0.0001             |

\*5 patients with events had dual seizure-specific/non-specific indications
